# Supplementary material for: Disruption of the Basal Body Protein POC1B Results in Autosomal-Recessive Cone-Rod Dystrophy
Source: PubMed Central journal article supplement (PMC4129401; doi:10.1016/j.ajhg.2014.06.012), 2014-08-07
Supplement: mmc1.pdf [file mmc1.pdf]

**The American Journal of Human Genetics, Volume 95**

**Supplemental Data**

## **Disruption of the Basal Body Protein POC1B**

### **Results in Autosomal-Recessive Cone-Rod Dystrophy**

**Susanne Roosing, Ideke J.C. Lamers, Erik de Vrieze, L. Ingeborgh van den Born,  
Stanley Lambertus, Heleen H. Arts, Consortium, Theo A. Peters, Carel B. Hoyng, Hannie  
Kremer, Lisette Hetterschijt, Stef J.F. Letteboer, Erwin van Wijk, Ronald Roepman,  
Anneke I. den Hollander, and Frans P.M. Cremers**

## Figure S1. Domain structure POC1B and FAM161A

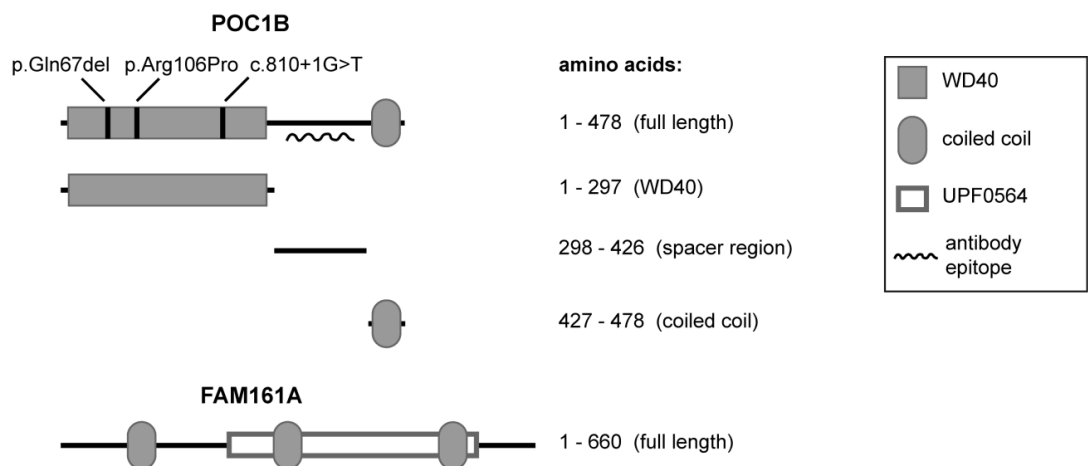

### Figure S1. Domain structure POC1B and FAM161A

The *POC1B* gene encodes a 478 amino acid (aa)/ 54 kDa protein (UniProt ID: POC1B\_HUMAN, Q8TC44) and is predicted to contain an N-terminal WD40 domain with seven WD40 repeats, and a C-terminal coiled-coil domain. All three variants lie within the WD40 domain. For the yeast two-hybrid screen of the retinal cDNA library, three bait fragments were generated containing either the WD40 domain, spacer region or coiled-coil domain.  $0.97 \times 10^6$ ,  $2.25 \times 10^6$ , and  $1.56 \times 10^6$  cDNA clones were screened for binary interactions, respectively. Only the coiled-coil domain yielded in-frame positive clones not previously identified as background. Two overlapping clones of *FAM161A* were identified, encoding aa 50-660 and aa 65-660 of *FAM161A*. Four other in-frame clones were identified, but as these did not encode ciliary nor retinal degeneration-associated proteins, none of these were further validated. The *POC1B* antibody was raised against the spacer region. *FAM161A* is a 660 aa/ 77 kDa protein (UniProt ID: F161A\_HUMAN, Q3B820) that is predicted to contain three coiled-coil domains and an uncharacterized protein family UPF0564 domain.

**Figure S2. Localization of wild-type and mutant POC1B in hTERT-RPE1 cells**

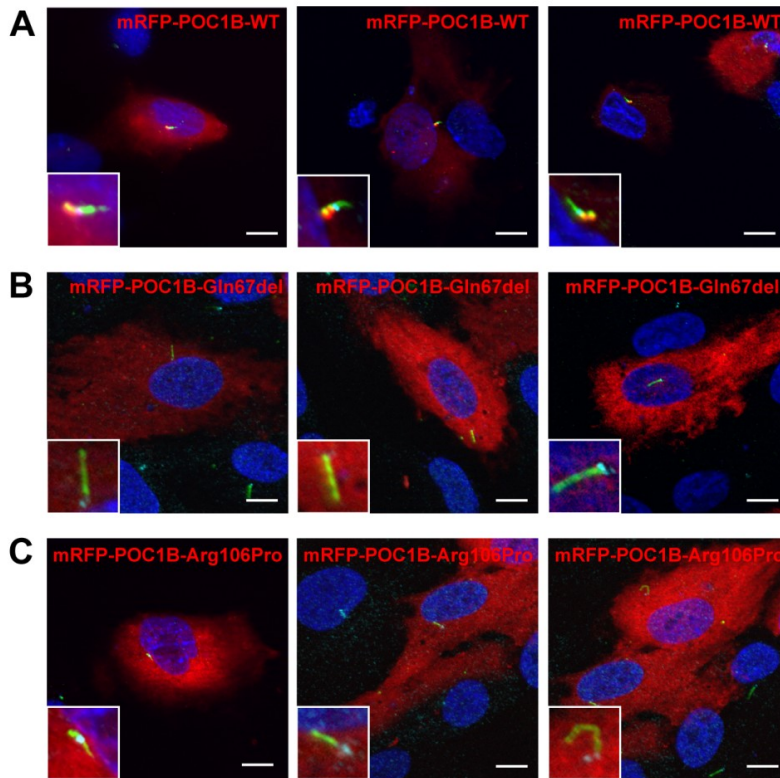

**Figure S2. Localization of wild-type and variant POC1B in hTERT-RPE1 cells**

Overlay photomicrographs of additional fields of hTERT-RPE1 cells corresponding to the images depicted in Figures 3A-C. (A) Overlay images of the localization of wild-type mRFP-POC1B. Cilia are counterstained with the basal-body and cilium marker GT335 (green) and transition zone marker RPGRIP1L (cyan). (B) Overlay images of the localization of mRFP-POC1B-Gln67del, and (C) mRFP-POC1B-Arg106Pro (both in red). Here, cilia are counterstained with a rabbit polyclonal antibody against ARL13B in green (1:500; Proteintech, Chicago, IL, USA) and centrosomes are counterstained with a mouse monoclonal antibody against centrin in cyan (1:500; Millipore, Billerica, MA, USA). Wild-type mRFP-POC1B shows cytosolic localization with enrichment at the basal body region, as seen in the magnifications in the insets. Both variants show similar cytosolic localization but lack the enrichment at the base of the cilium. In all pictures nuclei are stained with DAPI (blue). Scale bars: 10  $\mu\text{m}$ .

**Figure S3. Immunohistochemistry of Poc1b in rat retina**

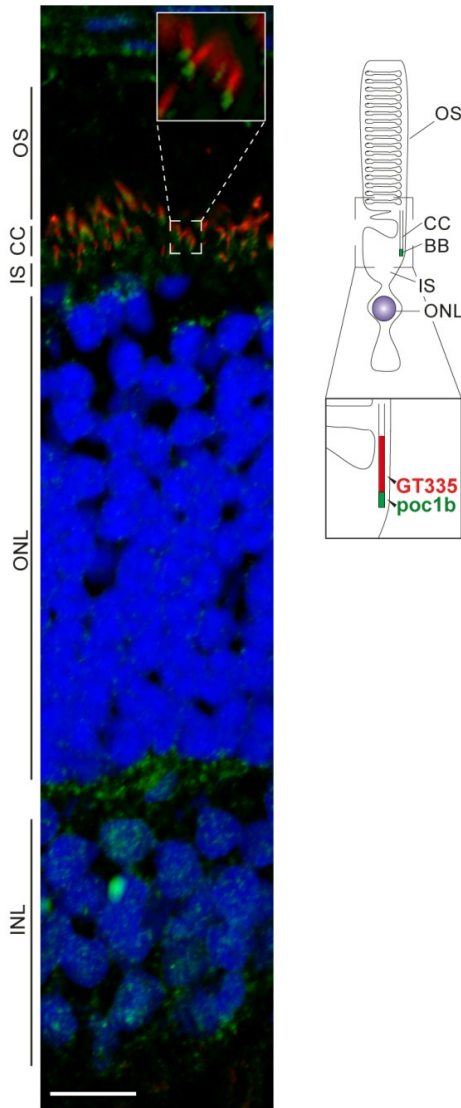

**Figure S3. Immunohistochemistry of Poc1b in rat retina**

Immunohistochemistry of Poc1b on a cryosection of an unfixed rat retina. Poc1b immunoreactivity in the photoreceptor is observed overlapping with, and adjacent to, GT335 staining (red), a marker of the connecting cilium. OS = outer segment, CC = connecting cilium, BB = basal body, IS = inner segment, ONL = outer nuclear layer. Scale bar = 10  $\mu$ m.

## Figure S4. Phenotypic analysis of *poc1b* morphant zebrafish

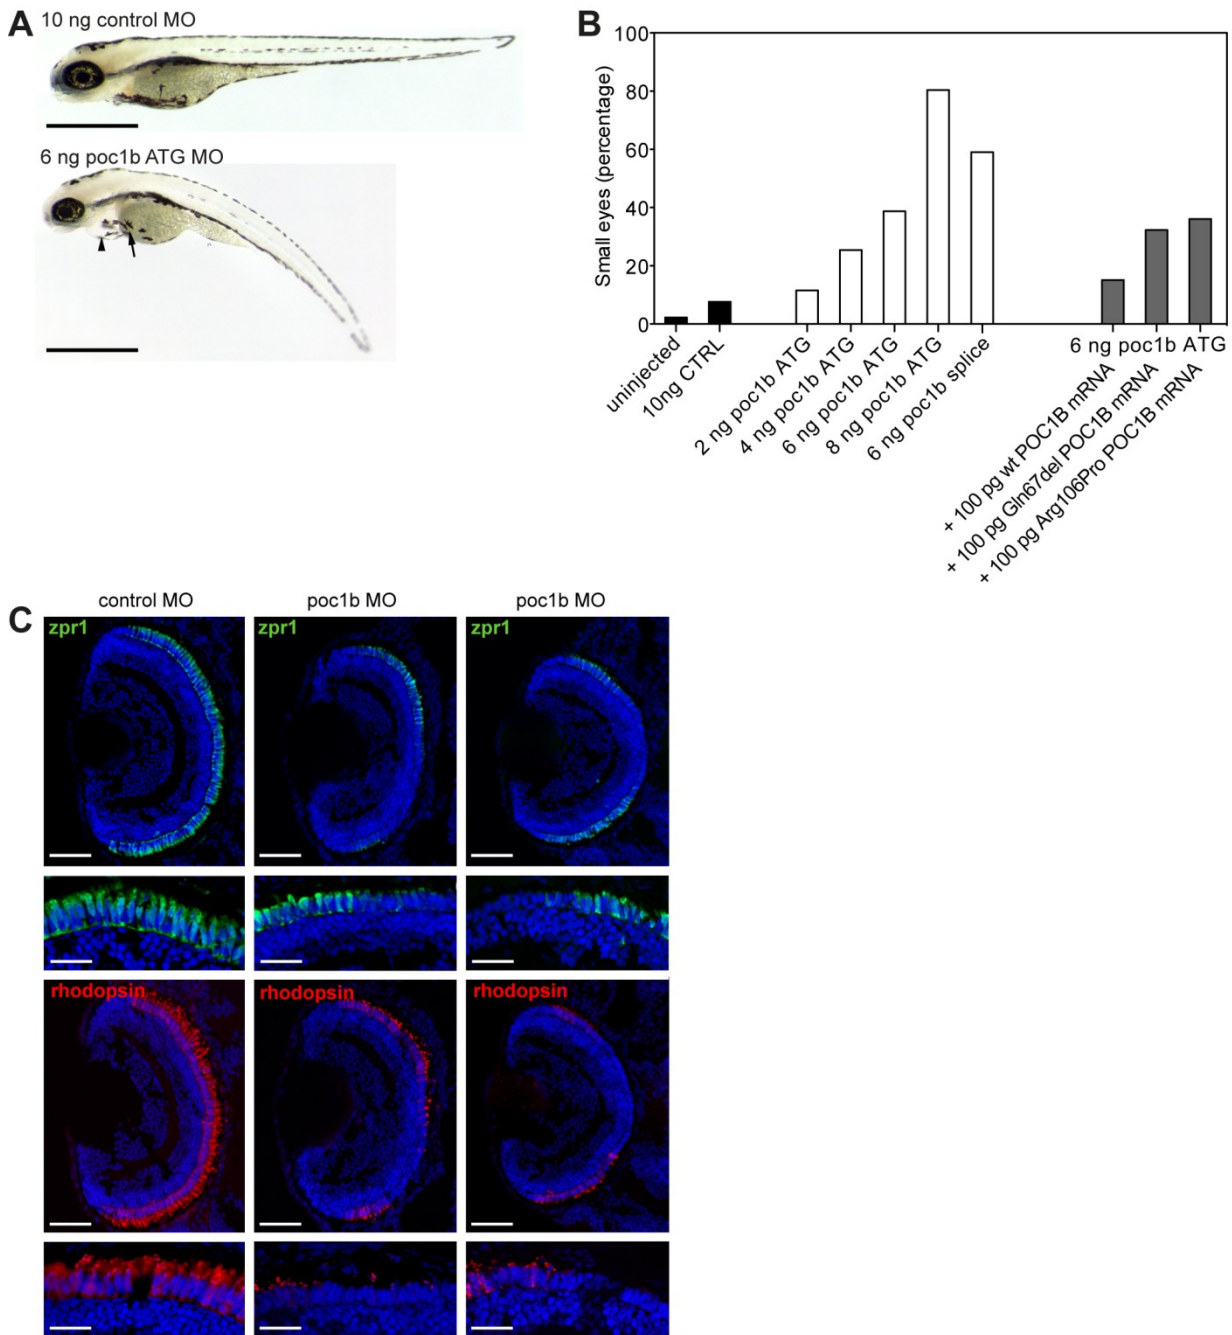

### Figure S4. Phenotypic analysis of *poc1b* morphant zebrafish

(A) Morphology of *poc1b* injected larvae. Morphants had smaller eyes, curved body axis, pigment mislocalization (arrow) and pericardial edema (arrowhead). None of these phenotypes were observed in control injected animals. (B) Overview of the occurrence of small eyes in *poc1b* morpholino oligonucleotide (MO) knockdown experiments. This phenotype increased dose-dependently with the amount of injected MO. At 8 ng almost all morphants had smaller eyes, but mortality was also increased compared to controls. In all other groups mortality was similar compared to control injected animals. (C) Immunohistochemistry of cone (*zpr1*, green) and rod (rhodopsin, red) markers in control and morphant (6 ng) eyes. Not only were the eyes smaller, both *zpr1* and rhodopsin immunoreactivity was absent in some parts of the morphant retina. Scale bar = 50  $\mu$ m in low magnification pictures and 15  $\mu$ m in high magnification pictures.

## Figure S5. Yeast two-hybrid and coimmunoprecipitation of POC1B and FAM161A

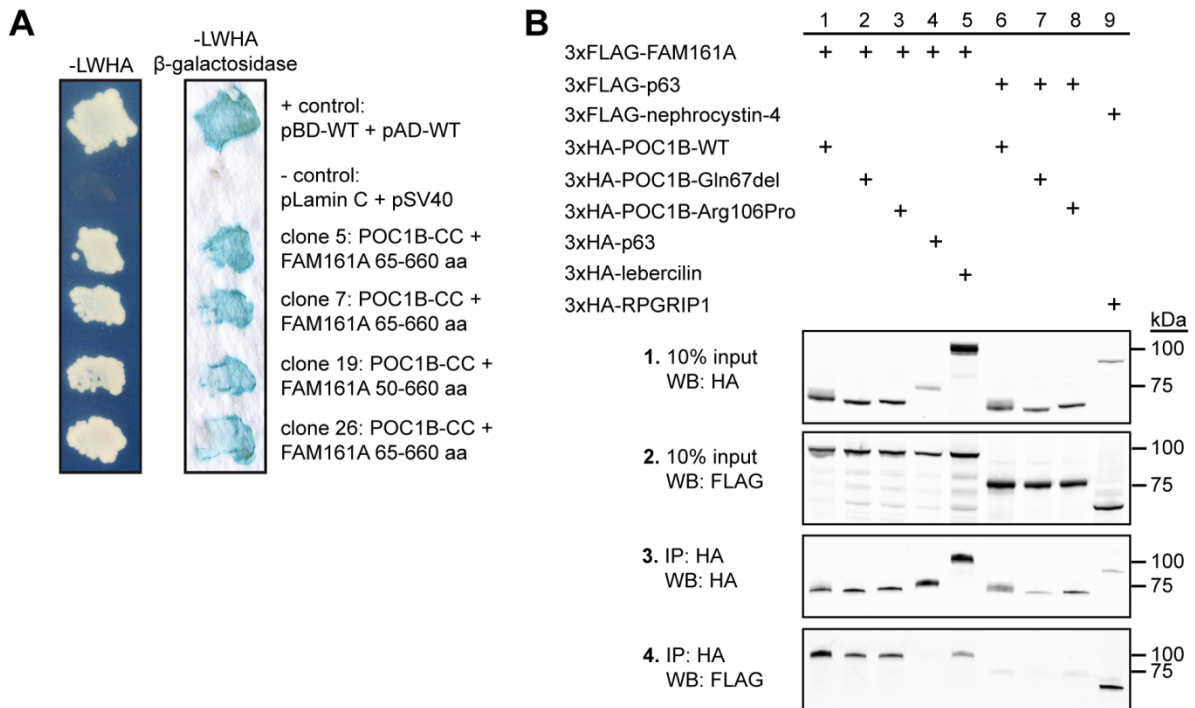

### Figure S5. Yeast two-hybrid and coimmunoprecipitation of POC1B and FAM161A

(A) POC1B interacts with FAM161A in a yeast two-hybrid assay. Interactions were analyzed by assessment of reporter gene activation via growth on selective media (-LWHA) and by a colorimetric filter lift assay (-LWHA;  $\beta$ -galactosidase). The POC1B fragment containing the coiled-coil domain spanning amino acids (aa) 427 – 478 (POC1B-CC) was found to bind the FAM161A fragment containing aa 50-660 in one yeast clone (clone 19) and a fragment containing aa 65-660 of FAM161A in three yeast colonies (clones 5, 7, and 26). (B) Coimmunoprecipitation assay in HEK293T cells. Wild-type 3xFlag-FAM161A efficiently coprecipitated with 3xHA-POC1B using anti-HA antibodies (panel 4, lane 1). Introduction of the POC1B variants p.Gln67del and p.Arg106Pro reduced the coimmunoprecipitation efficiency (panel 4, lanes 2 and 3). Specificity was confirmed by including the unrelated 3xFLAG-p63 protein, which failed to coprecipitate significantly with wild-type and mutant 3xHA-POC1B, and the 3xHA-p63 protein, which did not coprecipitate with 3xFLAG-FAM161A. As positive controls of the coimmunoprecipitation assay, coprecipitation of 3xHA-lebercilin with 3xFLAG-FAM161A, and of 3xHA-RPGRIP1 with 3xFLAG-nephrocystin-4 were used. Immunoblots of 10% of the input are shown in panels 1 and 2, immunoblots of the HA immunoprecipitates in panels 3 and 4. Size markers are depicted in kDa.

**Figure S6.** Western blots of coimmunoprecipitation of POC1B with FAM161A

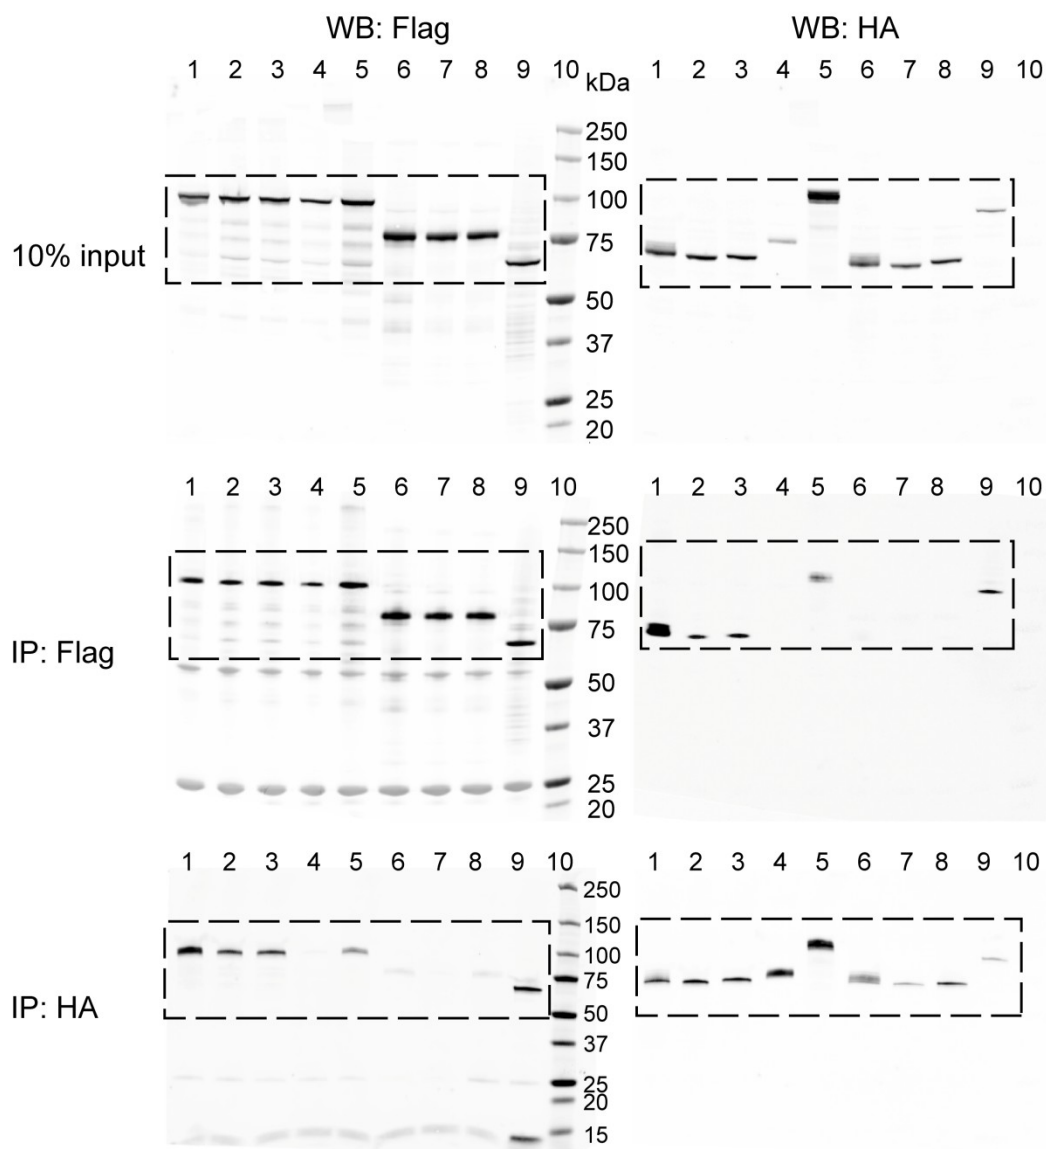

**Figure S6. Western blots of coimmunoprecipitation of POC1B with FAM161A**

Uncropped immunoblots of the coimmunoprecipitation assay of FAM161A and POC1B. Dashed rectangles indicate cropped immunoblots shown in Figure 5 and S5. The upper blots show 10% of the input used in the coimmunoprecipitation experiment, the middle blots the FLAG precipitates and the lower blots the HA precipitates. The protein bands were visualized by either staining with FLAG-antibody (left blots) or HA-antibody (right blots). Lane numbering as follows, lane 1: 3xFLAG-FAM161A + 3xHA-POC1B-WT; lane 2: 3xFLAG-FAM161A + 3xHA-POC1B-Gln67del; lane 3: 3xFLAG-FAM161A + 3xHA-POC1B-Arg106Pro; lane 4: 3xFLAG-FAM161A + 3xHA-p63; lane 5: 3xFLAG-FAM161A + 3xHA-lebercilin; lane 6: 3xFLAG-p63 + 3xHA-POC1B-WT; lane 7: 3xFLAG-p63 + 3xHA-POC1B-Gln67del; lane 8: 3xFLAG-p63 + 3xHA-POC1B-Arg106Pro; lane 9: 3xFLAG-nephrocystin-4 + 3xHA-RPGRIP1; lane 10: Marker. Size markers are depicted in kDa.



**Figure S7. Localization studies of POC1B and FAM161A in hTERT-RPE1 cells**

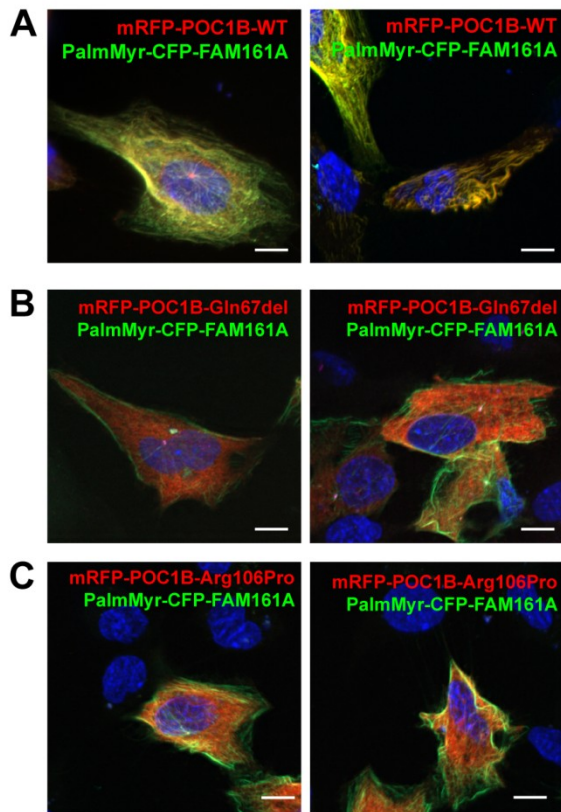

**Figure S7. Localization studies of POC1B and FAM161A in hTERT-RPE1 cells**

Overlay photomicrographs of additional fields of hTERT-RPE1 cells corresponding to the images depicted in Figure 5B-D. (A) Overlay images of localization upon overexpression in hTERT-RPE1 cells. PalmMyr-CFP-FAM161A (green) was targeted to the cell membrane and microtubules, and translocated mRFP-POC1B wild-type (red) from the cytosol towards the cell membrane and microtubules. (B) This translocation by PalmMyr-CFP-FAM161A (green) is not observed for mRFP-POC1B-Gln67del (red) nor (C) mRFP-POC1B-Arg106Pro (red) which both maintain their cytosolic localization. RPGRIP1L (cyan) was used as transition zone marker of the cilium. Nuclei are stained with DAPI (blue). Scale bars: 10 μm.



**Table S1. Primer sequences for *POC1B***

| <i>POC1B</i> exon | Forward                | Reverse                | Product size (bp) |
|-------------------|------------------------|------------------------|-------------------|
| Exon 1            | tctccttccccatcctctc    | gctacggacacctgcctc     | 205               |
| Exon 2            | gactccggggaagtggc      | ccggcccatggagtttag     | 225               |
| Exon 3            | gccgctctattacctggatg   | gagaataacagtgcaggcagc  | 286               |
| Exon 4            | catggaaatttcagtgttgacg | ttgtttactaccgttccgc    | 519               |
| Exon 5            | catgggatggtaacagtggtc  | cccggccatatttcaatttc   | 340               |
| Exon 6            | tgcggtgagctgacattg     | cccatgacccaagtaagac    | 338               |
| Exon 7            | ttgctaataaggcactgggg   | agcagcaatgtgtgctatgctc | 332               |
| Exon 8            | actctgccagcattagttgc   | tcttagctgaggtcaaggattc | 294               |
| Exon 9            | ttgtgggttttaaaatcagctc | cctccttcagcaaaagcctc   | 293               |
| Exon 10           | tgaaaaccttttatttctgggg | cctggaaattgttgctgctc   | 521               |
| Exon 11           | aaatcttcaatgtaagcctggg | agaaatctccctgctctgc    | 434               |
| Exon 12           | gtcatcctcaccaccagagg   | gcacatggttgtgtgtatgg   | 265               |

**Table S2. Primer sequences for *POC1B* mRNA analysis**

| Gene         | Forward               | Reverse               | Product size (bp) |
|--------------|-----------------------|-----------------------|-------------------|
| <i>POC1B</i> | cacccgatggaagactaattg | aagaagatgtggtggtgaatc | 521               |
| <i>GUSB</i>  | ctgtacacgacaccaccac   | tacagataggcagggcgttc  | 245               |

**Table S3. Variants after stringent filtering for family A**

| Gene                         | DNA       | Protein     | Coverage | % variation | SNP allele frequency | Allele frequency in house-database | PhyloP | Grantham | SNP identity |
|------------------------------|-----------|-------------|----------|-------------|----------------------|------------------------------------|--------|----------|--------------|
| <i>Homozygous</i>            |           |             |          |             |                      |                                    |        |          |              |
| <i>POC1B</i>                 | c.317G>C  | p.Arg106Pro | 50       | 98          | 0                    | 0                                  | 6.13   | 103      | rs76216585   |
| <i>Compound heterozygous</i> |           |             |          |             |                      |                                    |        |          |              |
| <i>ASTE1</i>                 | c.95G>T   | p.Gly32Val  | 112      | 46.4        | 0                    | 0                                  | 5.32   | 109      |              |
| <i>ASTE1</i>                 | c.796T>G  | p.Phe266Val | 36       | 22.2        | 0                    | 0                                  | 4.63   | 50       |              |
| <i>CNTN3</i>                 | c.725G>A  | p.Gly242Asp | 51       | 27.4        | 0.0221               | 0                                  | 2.54   | 94       | rs150505018  |
| <i>CNTN3</i>                 | c.2308C>T | p.Pro770Ser | 98       | 27.5        | 0                    | 0                                  | 2.15   | 74       |              |
| <i>TUBGCP2</i>               | c.1064C>T | p.Thr355Met | 8        | 37.5        | 0                    | 0                                  | 5.55   | 81       |              |
| <i>TUBGCP2</i>               | c.172C>T  | p.Arg58Cys  | 21       | 38.1        | 0                    | 0                                  | 2.20   | 180      |              |

**Table S4. Variants after stringent filtering for family B**

| Gene                         | DNA          | Protein                           | Coverage | % variation | SNP allele frequency | Allele frequency in house-database | PhyloP | Grantham | SNP identity |
|------------------------------|--------------|-----------------------------------|----------|-------------|----------------------|------------------------------------|--------|----------|--------------|
| <i>Compound heterozygous</i> |              |                                   |          |             |                      |                                    |        |          |              |
| <i>NUDT14</i>                | c.154C>T     | p.Arg52Trp                        | 38       | 20          | 0.0665               | 0                                  | 0.96   | 101      | rs142762135  |
| <i>NUDT14</i>                | c.136C>A     | p.Leu46Ile                        | 33       | 15          | 0.0667               | 0                                  | 3.99   | 5        | rs148004115  |
| <i>PIKFYVE</i>               | c.1770C>T    | p.=                               | 50       | 17          | 0.1781               | 0.23                               | 3.41   | -        | rs61752185   |
| <i>PIKFYVE</i>               | c.5726C>T    | p.Ala1909Val                      | 20       | 10          | 0                    | 0                                  | 5.84   | 64       |              |
| <i>POC1B</i>                 | c.810+1G>T   | p.Phe188Aspfs*73/p.Val226Glyfs*30 | 62       | 27          | 0                    | 0.08                               | 6.072  | -        |              |
| <i>POC1B</i>                 | c.199_201del | p.Gln67del                        | 27       | 6           | 0                    | 0.15                               | 4.68   | -        |              |
